# Supplementary material for: The MYB Transcription Factor GmMYB78 Negatively Regulates Phytophthora sojae Resistance in Soybean
Source: MDPI journal article supplement (doi:10.3390/ijms25084247), 2024-04-11
Supplement: s1 [file s1]

**A**

```

1  ATGGATGTTAAGAAAGTGGTCTGTAGTACAAGCACAAGTGAAGTTGCAGAAGCATAAC
   M D V K K G G S V Y Q A Q V K L Q K H N
61  GAAAGGAGATGGGCATGAGAAAAGTCCATGGCGGTGAGGAGGACACCATCTGGTC
   E K E M G M R K G P W A V E E D T I L V
121  AATTACATGCCACACACGGTGAAGGCCACTGGAATTCCTGGCACGATGTGCAGGTCTA
   N Y I A T H G E G H W N S V A R C A G L
181  AGGAGAGTGGGAAGATTGCGATTAAAGTGGCTAACTACTTGCGCCAGACCTGGCG
   E R S G K S C R L R W L N Y L R P D V R
241  CTTGGAATATCACTCCAAGACAAATATTAATTCGACCTTCACTCTCGCTGGGGC
   E G N I T L Q E Q I L I L D L H S R W G
301  AACAGGTGTCAAAGATTGCTCAACAGCTGCCAGGAAGAACAACGAAATAAAGAAC
   N R W S K I A Q Q L P G R T D N E I K N
361  TATTGAGGACCAAGTGATAAAACAAGCAAGCACTAAAGTCGATGTGAATAGCAAA
   Y W R T R Y I K Q A K Q L K C D V N S K
421  CAGTTCAGAGACAGTTGCGTTACGTTTGGATGCCCGCTTGTCTGGAGCGGCTTCAGCC
   Q F R D T L R Y V W M P R L L E R L Q P
481  ACATCACAAGCACTGGAGCAAACAAAGTGGACTTGTGTACAGCTTCATCATCACTG
   T S Q A L E P N Q S G L V L H A S S S L
541  CTTCTTGAATTCGACCATAGTATTGAAAGGGGTCGGATCTGTGCCAGGTTCAAT
   L P S N S D H S I E R G S D L W P G F N
601  AACCAATGTTGTTGGAACAGGGAGTGGCGGTGACTTGTGGAAGTTTGTGGGATGAC
   N Q M L L E Q G S G G D L L E S L W D
661  GACAATATGTCTTTTGAACAGCTTCTTATGACCTCCAAATGAAATAA
   D N M C F L Q Q L S Y D L Q M K *

```

**B**

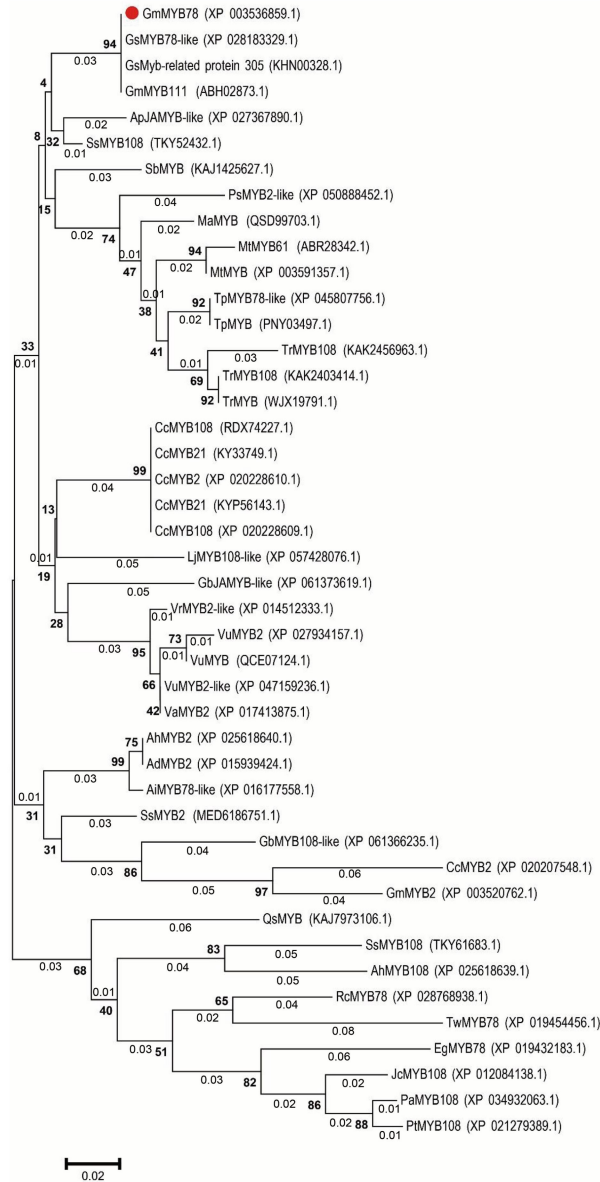

**Figure S1.** Nucleotide and amino acid sequences analyses of GmMYB78. (A)The MYB domain is shown in shadow. (B) Phylogenetic analysis of GmMYB78 with homologous genes.

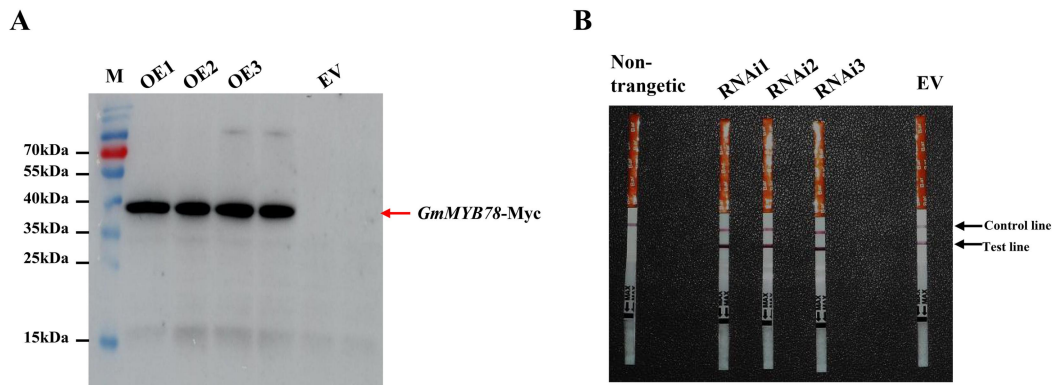

**Figure S2.** Analyses of *GmMYB78* transgenic soybean hairy roots. (A) Immunoblots showing the expression of the *GmMYB78*-Myc fusion protein in *GmMYB78*-OE transgenic hairy roots and the EV controls. The total protein extracts were analyzed using a 12% SDS-PAGE, and the immunoblot was probed with anti-Myc antibody. (B) The *GmMYB78*-RNAi and EV transgenic hairy roots were tested using QuickStix Kit for LibertyLink (bar) strips.

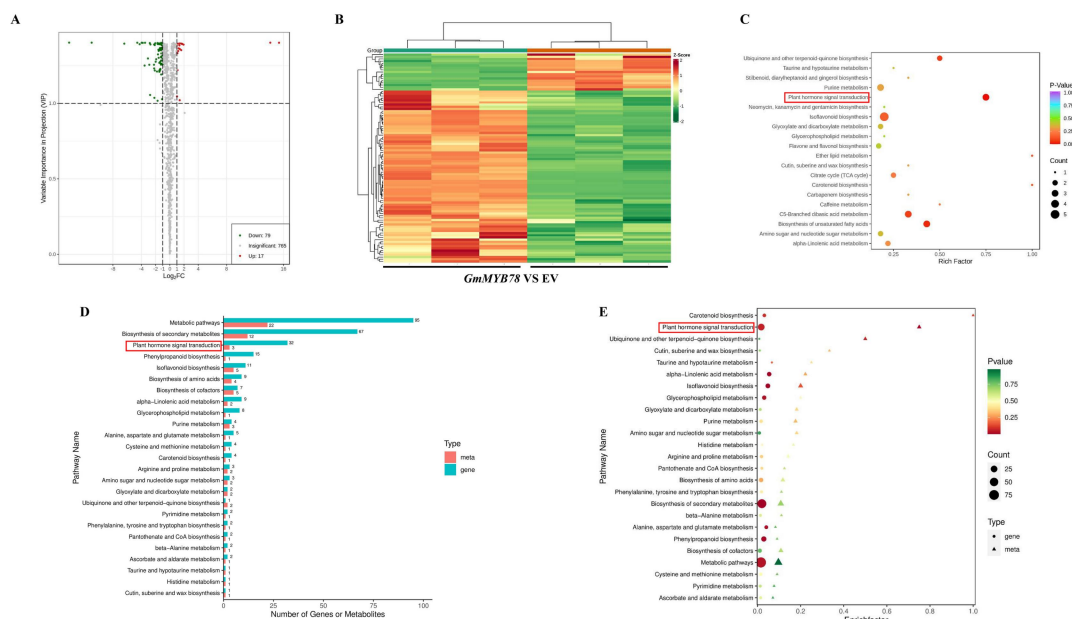

**Figure S3.** Metabolome analysis of metabolites in *GmMYB78* overexpression transgenic soybean hairy roots. (A) Volcano plots of significantly differentially metabolites in *GmMYB78*-OE vs. EV transgenic soybean hairy roots. (B) Heat map of significantly differentially metabolites between the EV and *GmMYB78*-OE transgenic soybean hairy roots. Using VIP  $\geq 1$  and fold-change set at  $\geq 2$  as the screening criteria, a total of 96 differentially metabolites were identified. (C) Metabolite annotation of KEGG classification of differentially metabolites. The differentially expressed metabolites are mainly involved in multiple biological processes, including plant hormone signal transduction. (D) KEGG classification bar chart of combined analysis of transcriptome and metabolome. The bar chart shows the number of differential metabolites and differential genes enriched to a certain pathway. (E) KEGG classification bubble chart of combined analysis of transcriptome and metabolome. Showing the top 25 pathways for P-value.

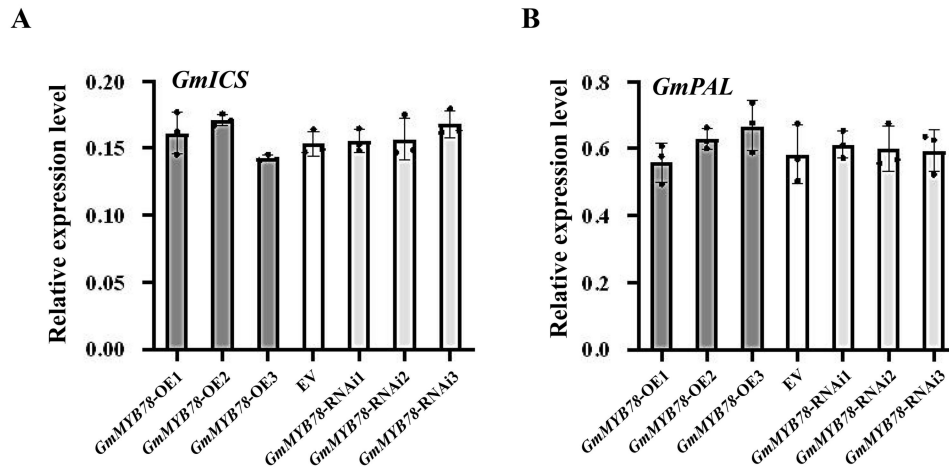

**Figure S4.** Investigation of the relationship between *GmMYB78* and the salicylic acid (SA) pathway in soybean. (**A,B**) Relative transcript level of *GmICS* (A) or *GmPAL* (B) in *GmMYB78*-OE, *GmMYB78*-RNAi and EV transgenic soybean hairy roots. The level of the control sample (EV lines) was set to unity. The reference gene *GmEF1 $\beta$*  and *GmTUB4* were used as reference genes. The experiment was performed on three biological replicates, each with three technical replicates, and was statistically analyzed using Student's *t*-test (\**P* < 0.05, \*\**P* < 0.01). Bars indicate the standard error of the mean.

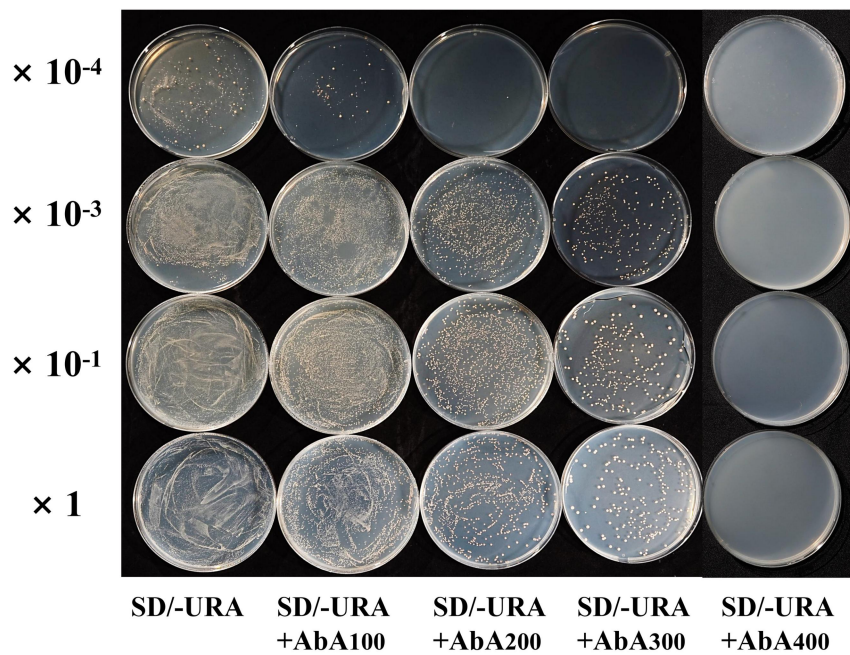

**Figure S5.** Screening of AbA concentration of Y1H [pBait-AbAi-*pGmbZIP25*] strain.  $\times 1$  represents the OD<sub>600</sub> of the bait strain Y1H[pBait-AbAi-*pGmMYB78*] as 0.02;  $10^{-1}$ ,  $10^{-2}$  or  $10^{-3}$  represent dilutions of 10

times, 100 times, 1000 times, respectively. They were spread on solid SD/-Ura (SD medium without Ura) medium with different concentrations of AbA (100 ng/mL, 200 ng/mL, 300 ng/mL, 400 ng/mL) and incubated inverted on plates for 5 days.

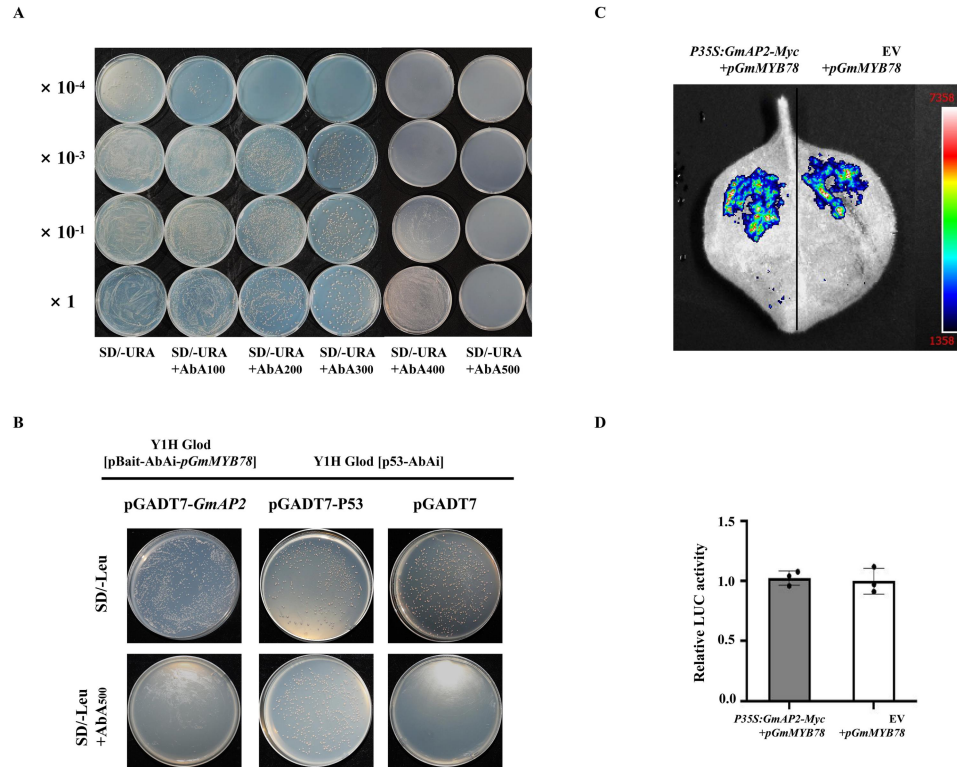

**Figure S6.** GmAP2 cannot directly regulate *GmMYB78*. **(A)** Screening of AbA concentration of Y1H [pBait-AbAi-*pGmMYB78*] strain.  $\times 1$  represents the OD<sub>600</sub> of the bait strain Y1H[pBait-AbAi-*pGmMYB78*] as 0.02;  $10^{-1}$ ,  $10^{-2}$  or  $10^{-3}$  represent dilutions of 10 times, 100 times, 1000 times, respectively. They were spread on solid SD/-Ura (SD medium without Ura) medium with different concentrations of AbA (100 ng/mL, 200 ng/mL, 300 ng/mL, 400 ng/mL, 500 ng/mL) and incubated inverted on plates for 5 days. **(B)** Verification of GmAP2 regulate *GmMYB78* in yeast. **(C)** Dual-luciferase assay in *N. benthamiana* leaves showing that GmAP2 promotes the expression of *GmMYB78*. Representative photographs are shown. **(D)** Detection of LUC/Rluc activity to verify whether GmAP2 promotes the expression of *GmMYB78*. The combination of the reporter construct (*pGmMYB78*: LUC) and EV was used as a control. The experiment was performed on three biological replicates, each with three technical replicates, and the results were statistically analyzed using Student's *t*-test (\**P* < 0.05, \*\**P* < 0.01). Bars indicate the standard deviation of the mean (n=3).

**Table S1. List of upstream protein of GmMYB78.****Library screening results by yeast one-hybrid**

| GenBank ID     | Gene                                           | Number of clones |
|----------------|------------------------------------------------|------------------|
| XM-003519791.5 | Zinc-finger homeodomain protein                | 17               |
| XM-014770182.3 | Peroxisomal biogenesis factor 11family protein | 1                |
| XM-003522700.5 | AT-hook motif nuclear-localized protein 17     | 2                |
| XM-003543501.5 | Transcription factor GmbHLH122                 | 1                |

**Table S2. List of primers used in this study.****Primers for quantitative real-time PCR**

| Primer name               | Primers (5'-3')                                                   |
|---------------------------|-------------------------------------------------------------------|
| <i>GmMYB78-RT-qPCR</i>    | F: GGAGGAGTGGGAAGAGTTGC<br>R: GTGATATTTCCACGCCGCAC                |
| <i>GmTUB4- RT-qPCR</i>    | F: GCGGTCCACATTCATTGGA<br>R: CCGGTGTACCAATGCAAGAA                 |
| <i>GmEF1β- RT-qPCR</i>    | F: CCACTGCTGAAGAAGATGATGATG<br>R: AAGGACAGAAGACTTGCCACTC          |
| <i>TEF1- RT-qPCR</i>      | F: TGATCGTGCTGAACCACCC<br>R: CGAGCGACGGTCCATCTT                   |
| <i>PSPEL1- RT- qPCR</i>   | F: CCGCGT ACG TGGC TT TGGTGAG<br>R: ATCT TGGCGAC TGAGGC TGC T TAC |
| <i>GmPR1- RT-qPCR</i>     | F: GCCCTTATCGGGGTGTTTCT<br>R: TCCTTTCTTCCTGTGTGATTGC              |
| <i>GmPR2- RT-qPCR</i>     | F: CTTCGGTATGTGTTGCTTCGT<br>R: TTCCTGTATTGTGCCGCCTT               |
| <i>GmPR3- RT-qPCR</i>     | F: TTCTCCTTCTCCTCTTCTCCTT<br>R: TGCCTTTGCCTACTGTATGT              |
| <i>GmPR10- RT-qPCR</i>    | F: TTCGCCGTGTGTGCTTATTGT<br>R: TATCCTCCTCTTCCTCTATTGTC            |
| <i>GmAOS1- RT-qPCR</i>    | F: AAGTGCATCACTGACGAGGG<br>R: TGTGGGAACCCACCTTCAAC                |
| <i>GmJAZ1- RT-qPCR</i>    | F: AGTGGTGTGGCTCAGGAATG<br>R: GAGGGGCAAGGGCTATGTA                 |
| <i>GmJAZ2- RT-qPCR</i>    | F: GCAGAAGAACAACAACGACGG<br>R: CGAGGGGGTTTGACGTAGAG               |
| <i>GmbHLH122- RT-qPCR</i> | F: TGCCACTCACCCAAGAA<br>R: CCACAGCCAAGTCCAAC                      |

**Primers for gene cloning**

| Primer name      | Primers (5'-3')                                          |
|------------------|----------------------------------------------------------|
| <i>GmMYB78</i>   | F: ATGGATGTTAAGAAAGGTGGGT<br>R: TTATTTCAATTGGAGGTCATAAGA |
| <i>GmbHLH122</i> | F: ATGGAGTCAGATCTCGAGCAAC<br>R: TTATTGTGCTTCTCGTGTGA     |

**Primers for constructs in transformation of soybean hairy roots**

| Primer name        | Primers (5'-3')                                |
|--------------------|------------------------------------------------|
| <i>GmMYB78-Myo</i> | F:CGGGGGACTCTTGACCATGGAAATGGATGTTAAGAAAGGTGGGT |

|                      |                                                                                                                                                                         |
|----------------------|-------------------------------------------------------------------------------------------------------------------------------------------------------------------------|
| <i>GmMYB78 RNAi1</i> | R: CCCACGTGGCTAGC AGATCT TTTCATTTGGAGGTCATAA<br>F:TTTCATTTGGAGAGGACACGCTCGAGATGGATGTTAAGAAAGGTGG<br>GTC                                                                 |
| <i>GmMYB78 RNAi2</i> | R:AATCATCGATTGGGCGCGCCCATGGTTCGCTTGTTTTATCACTCTGG<br>T<br>F:TCCCGGGTCTTAATTAACCTCTCTAGAATGGATGTTAAGAAAGGTGG<br>GTC<br>R:GTCAATTTGCAGGTATTTGGATCCTTCGCTTGTTTTATCACTCTGGT |

#### Primers for constructs in yeast one-hybrid assays

| Primer name                 | Primers (5'-3')                                                                                 |
|-----------------------------|-------------------------------------------------------------------------------------------------|
| <i>pGmMYB78</i>             | F: TTAACATATTAGATTGTGTAAAA<br>R: ACTTATTGGGGGCATGTGGAGTT                                        |
| <i>pGmMYB78-pBait-AbAi</i>  | F: AAAAGCTTGAATTCGAGCTCTTAACATATTAGATTGTGT<br>R: TACAGAGCACATGCCTCGAGACTTATTGGGGGCATGTG         |
| <i>GmbHLH122-AD</i>         | F: CCATGGAGGCCAGTGAATTCATGGAGTCAGATCTCG<br>R: AGCTCGAGCTCGATGGATCCTTATTGTTGCTTCTCGT             |
| <i>pGmbZIP25</i>            | F: CTATTTGATCCATACACATA<br>R: AGAAGGAGGAAGGAAAGAG                                               |
| <i>pGmbZIP25-pBait-AbAi</i> | F: AAAAGCTTGAATTCGAGCTC CTGTTGTCTATCAACGGATAAA<br>R:TACAGAGCACATGCCTCGAGAAGCTGATTCTCTGTTGCTGTTG |

#### Primers for subcellular localization

| Primer name         | Primers (5'-3')                                                                         |
|---------------------|-----------------------------------------------------------------------------------------|
| <i>GmMYB78-1302</i> | F: CGGGGGACTCTTGACCATGGATGTTAAGAAAGGTGGGT<br>R: AGATCTGACTAGT TTATTTCAATTTGGAGGTCATAAGA |

#### Primers for transient expression assay

| Primer name       | Primers (5'-3')                                                                               |
|-------------------|-----------------------------------------------------------------------------------------------|
| <i>GmMYB78-BD</i> | F: TGGCCATGGAGGCCGAATTCATGGATGTTAAGAAAGGTGG<br>R: CGCTGCAGGTCGACGGATCCTTATTTCAATTTGGAGGTCATAA |

#### Primers for transient transcription dual-luciferase assay

| Primer name           | Primers (5'-3')                                                                             |
|-----------------------|---------------------------------------------------------------------------------------------|
| <i>pGmMYB78-LUC</i>   | F: GTCGACGGTATCGATAAGCTTTTAACATATTAGATTGTGT<br>R: CGCTCTAGAACTAGTGGATCCACTTATTGGGGGCATGTG   |
| <i>GmbHLH122-3301</i> | F: CGGGGGACTCTTGA CCATGGAAATGGAGTCAGATCTCG<br>R: CCCACGTGGCTAGC AGATCTTTGTTGCTTCTCGT        |
| <i>pGmbZIP25-LUC</i>  | F: GTCGACGGTATCGATAAGCTTCTATTTGATCCATACACATA<br>R: CGCTCTAGAACTAGTGGATCCAGAAGGAGGAAGGAAAGAG |

#### Primers for transcriptome sequencing analysis

| Primer name          | Primers (5'-3')                                    |
|----------------------|----------------------------------------------------|
| <i>GmPRR13 -qPCR</i> | F: AAGTGCATCACTGACGAGGG<br>R: TGTGGGAACCCACCTTCAAC |

|                      |                                                      |
|----------------------|------------------------------------------------------|
| <i>GmbZIP25-qPCR</i> | F: AGTGGTGTGGCTCAGGAATG<br>R: GAGGGGCAAGGGCTATGTA    |
| <i>GmMYB177-qPCR</i> | F: GATGCTTCCCTTTTGGCTCCTT<br>R: AACAAACGGAGCCGTGCAAA |
| <i>GmPR-4A -qPCR</i> | F: ACCCTGAGCAGATTGGTTGG<br>R: ATCCTCACCGTAGCCTCAGT   |
| <i>GmLOX9-qPCR</i>   | F: GTCCATCAGTATTGGTGTAG<br>R: GTCCATCAGTCTTGGTGGCA   |
| <i>GmCHS13-qPCR</i>  | F: GAAGCTGGGAAAACAAGCCG<br>R: GAGAAGCTTCGTGAGCTGGT   |
| <i>GmBVT -qPCR</i>   | F: TGGCCCCGGAACCATTA<br>R: CTCCACTGTGTCTGGCAACC      |
| <i>GmARM -qPCR</i>   | F: ACTAGCACTGGTGGTGTGG<br>R: TGCCGTCATCCAAGTTTCCA    |

---
